# Supplementary material for: A pair of ionic 1D Cu(ii) chain enantiomers simultaneously displaying large second- and third-harmonic generation responses
Source: Royal Society of Chemistry journal article supplement (doi:10.1039/d3dt01923c), 2023-01-01
Supplement: d3dt01923c1.pdf [file d3dt01923c1.pdf]

## Supporting Information for

### A pair of ionic 1D Cu(II) chain enantiomers simultaneously displaying large second- and third-harmonic generation responses

Xiaodi Du,\* Congli Gao, Zhiqiang Zhang, Bing Su and Xi-Li Li\*

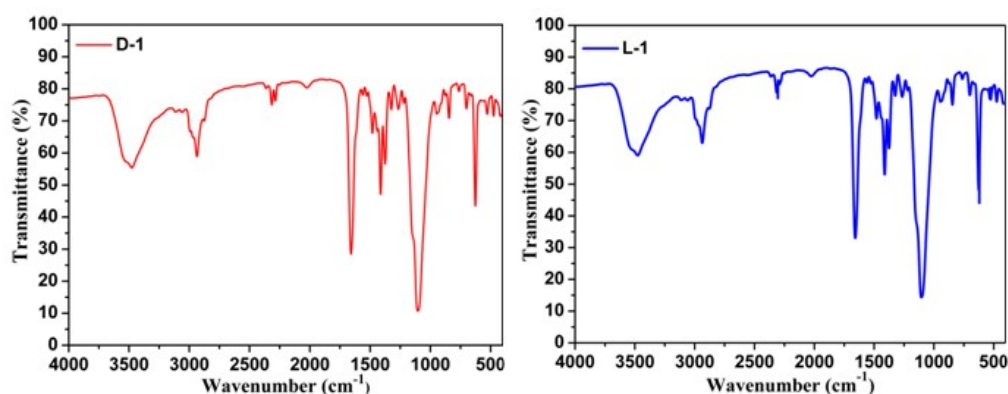

**Fig. S1** IR spectra of **D-1** and **L-1**. The broad bands at 3472 (3741) cm<sup>-1</sup> are attributed to the O–H stretching vibrations of H<sub>2</sub>O molecule; the strong peaks at 1661 (1662) cm<sup>-1</sup> originate from the C=O stretching vibrations of aldehyde group in DMF molecules; the strong peaks at 1101 cm<sup>-1</sup> and 628 cm<sup>-1</sup> are the asymmetric and symmetric stretching vibrations of ClO<sub>4</sub><sup>-</sup> groups.

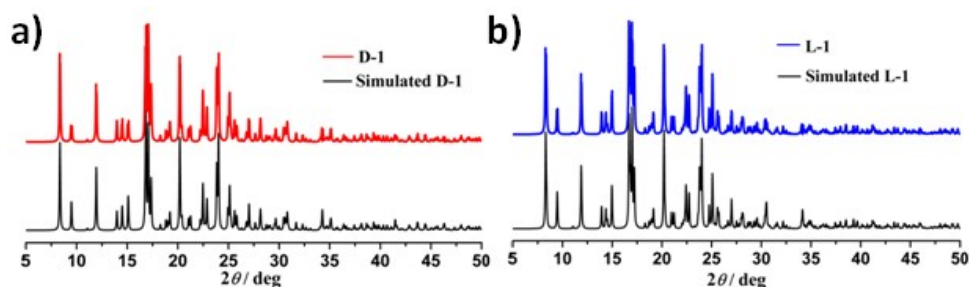

**Fig. S2** a) Experimental and simulated PXRD patterns of **D-1** polycrystalline sample.

b) Experimental and simulated PXRD patterns of **L-1** polycrystalline sample.

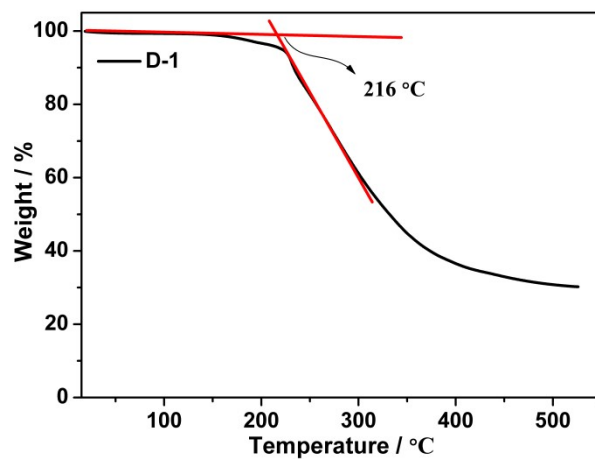

Fig. S3 Thermogravimetric analyses of D-1.

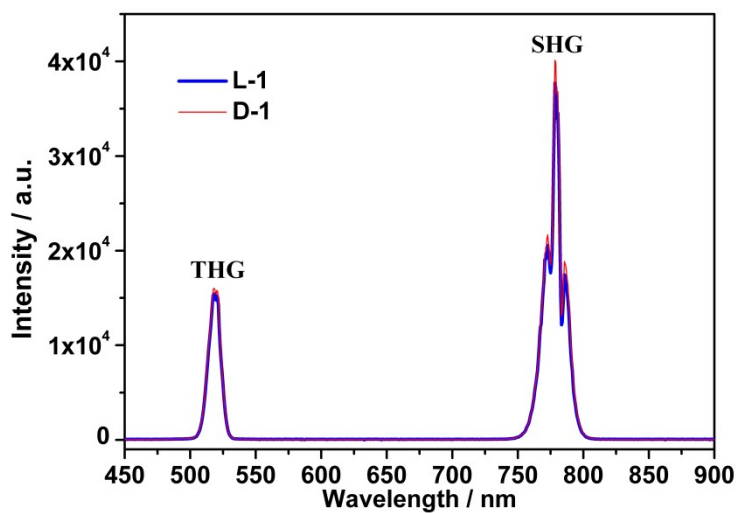

Fig. S4 THG and SHG spectra of D-1 and L-1 based on crystal samples under excitation at  $\lambda = 1550$  nm with  $T_{\text{int}} = 0.5$  s at room temperature.

**Table S1** Crystallographic data and structure refinement parameters for **D-1/L-1** enantiomeric pairs

| Complexes                                                         | <b>D-1</b>                                                                        | <b>L-1</b>                                                                        |
|-------------------------------------------------------------------|-----------------------------------------------------------------------------------|-----------------------------------------------------------------------------------|
| Chemical formula                                                  | C <sub>21</sub> H <sub>29</sub> N <sub>5</sub> O <sub>10</sub> Cl <sub>2</sub> Cu | C <sub>21</sub> H <sub>29</sub> N <sub>5</sub> O <sub>10</sub> Cl <sub>2</sub> Cu |
| Formula weight                                                    | 645.93                                                                            | 645.93                                                                            |
| Crystal system                                                    | orthorhombic                                                                      | orthorhombic                                                                      |
| Space group                                                       | <i>P2<sub>1</sub>2<sub>1</sub>2<sub>1</sub></i>                                   | <i>P2<sub>1</sub>2<sub>1</sub>2<sub>1</sub></i>                                   |
| <i>a</i> (Å)                                                      | 10.3721(2)                                                                        | 10.4203(3)                                                                        |
| <i>b</i> (Å)                                                      | 12.2081(3)                                                                        | 12.3268(3)                                                                        |
| <i>c</i> (Å)                                                      | 21.1481(5)                                                                        | 21.0653(6)                                                                        |
| $\alpha = \beta = \gamma$ (deg)                                   | 90                                                                                | 90                                                                                |
| <i>V</i> (Å <sup>3</sup> )                                        | 2677.85(10)                                                                       | 2705.82(13)                                                                       |
| <i>Z</i>                                                          | 4                                                                                 | 4                                                                                 |
| <i>D<sub>c</sub></i> (g cm <sup>-3</sup> )                        | 1.602                                                                             | 1.586                                                                             |
| $\mu$ (mm <sup>-1</sup> )                                         | 1.078                                                                             | 1.067                                                                             |
| F(000)                                                            | 1332                                                                              | 1332                                                                              |
| Reflections collected                                             | 7278                                                                              | 7908                                                                              |
| Independent reflections                                           | 5006                                                                              | 4905                                                                              |
| Data/restraints/parameters                                        | 5006/2/365                                                                        | 4905/2/362                                                                        |
| GOF                                                               | 1.096                                                                             | 0.996                                                                             |
| <i>R</i> <sub>1</sub> [ <i>I</i> > 2σ( <i>I</i> )] <sup>a</sup>   | 0.0621                                                                            | 0.0528                                                                            |
| w <i>R</i> <sub>2</sub> [ <i>I</i> > 2σ( <i>I</i> )] <sup>b</sup> | 0.1527                                                                            | 0.1113                                                                            |
| Flack parameter                                                   | 0.002(12)                                                                         | 0.001(13)                                                                         |
| CCDC                                                              | 2269485                                                                           | 2269487                                                                           |

$${}^a R_1 = \sum ||F_o| - |F_c|| / \sum |F_o|, \quad {}^b wR_2 = [\sum w(F_o^2 - F_c^2)^2 / \sum w(F_o^2)^2]^{1/2}$$

**Table S2** Selected bond lengths (Å) for **D-1/L-1**

| Bond lengths for <b>D-1</b> |          |             |          |             |          |
|-----------------------------|----------|-------------|----------|-------------|----------|
| Cu(1)—O(1)                  | 2.377(7) | Cu(1)—O(10) | 1.974(6) | Cu(1)—N(1)  | 1.990(6) |
| Cu(1)—N(2)                  | 2.010(6) | Cu(1)—N(4)  | 2.016(7) | Cu(1)—N(3A) | 2.601(7) |

Symmetry Codes for A:  $-x + 1/2, -y, z + 1/2$

| Bond lengths for <b>L-1</b> |          |             |          |             |          |
|-----------------------------|----------|-------------|----------|-------------|----------|
| Cu(1)—O(1)                  | 2.398(5) | Cu(1)—O(10) | 1.958(4) | Cu(1)—N(1)  | 1.990(5) |
| Cu(1)—N(2)                  | 2.014(5) | Cu(1)—N(4)  | 2.012(6) | Cu(1)—N(3A) | 2.588(6) |

Symmetry Codes for A:  $-x + 1/2, -y, z + 1/2$

**Table S3** Selected bond angles (°) for **D-1/L-1**

| Bond angles for <b>D-1</b> |         |                  |           |                  |         |
|----------------------------|---------|------------------|-----------|------------------|---------|
| N(1)-Cu(1)-N(2)            | 81.9(2) | N(4)-Cu(1)-N(2)  | 97.6(3)   | O(10)-Cu(1)-N(4) | 89.5(3) |
| O(10)-Cu(1)-N(1)           | 91.2(2) | O(1)-Cu(1)-N(3A) | 171.67(3) |                  |         |

Symmetry Codes for A:  $-x + 1/2, -y, z + 1/2$

| Bond angles for <b>L-1</b> |         |                  |           |                  |         |
|----------------------------|---------|------------------|-----------|------------------|---------|
| N(1)-Cu(1)-N(2)            | 81.9(2) | N(4)-Cu(1)-N(2)  | 97.6(2)   | O(10)-Cu(1)-N(4) | 90.1(2) |
| O(10)-Cu(1)-N(1)           | 90.9(2) | O(1)-Cu(1)-N(3A) | 170.41(2) |                  |         |

Symmetry Codes for A:  $-x + 1/2, -y, z + 1/2$

**Table S4** Calculated dipole moments of ionic **D-1** and molecular  $[\text{Cu}(\text{L}_R)(\text{NO}_3)_2]_n$ 

| Compound                 | <b>D-1</b> | $[\text{Cu}(\text{L}_R)(\text{NO}_3)_2]_n$ |
|--------------------------|------------|--------------------------------------------|
| $\mu_{\text{total}}$ (D) | 33.3972    | 17.6732                                    |
| X                        | 26.9433    | -11.6804                                   |
| Y                        | -18.7848   | 12.7715                                    |
| Z                        | -6.0466    | -3.5777                                    |
